# Supplementary material for: Degradation of diuron by heterogeneous electro-Fenton using modified magnetic activated carbon as the catalyst
Source: Royal Society of Chemistry journal article supplement (doi:10.1039/c8ra02776e), 2018-01-01
Supplement: c8ra02776e1.pdf [file c8ra02776e1.pdf]

## Supplementary Information

### Degradation of diuron by heterogeneous electro-Fenton using modified magnetic activated carbons as catalyst

Xi Wang,<sup>a</sup> Kai Zhu,<sup>a</sup> Xiaoyue Ma<sup>a</sup>, Zhirong Sun,<sup>a\*</sup> and Xiang Hu<sup>b\*\*</sup>

- a. National Engineering Laboratory for Advanced Municipal Wastewater Treatment and Reuse Technology, College of Environmental and Energy Engineering, Beijing University of Technology, Beijing 100124, China.

E-mail: [zrsun@bjut.edu.cn](mailto:zrsun@bjut.edu.cn);

Tel: +86-13718215082

- b. College of Chemical Engineering, Beijing University of Chemical Technology, Beijing 100029, China.

E-mail: [huxiang99@163.com](mailto:huxiang99@163.com)

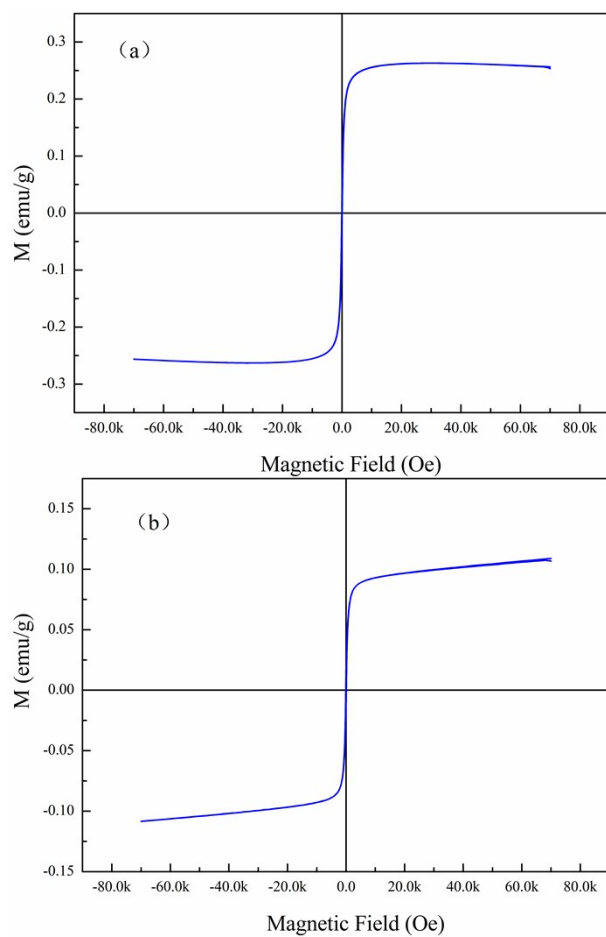

**Supp. Fig. 1.** Magnetization Curves of (a) before PTFE modification, (b) after 5% PTFE modification.

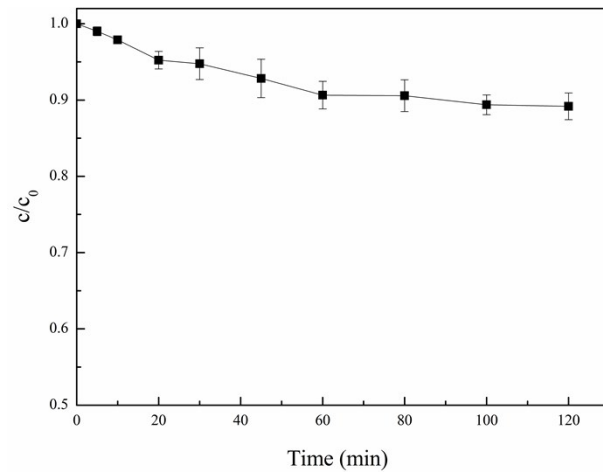

**Supp. Fig. 2.** The electroosmotic flow (ES) of the cathode, Conditions:  $I = 100$  mA,  $\text{pH } 6.7 \pm 0.2$ , 300mL diuron 10 mg/L.
